1

2 **Effects of early life stress and subsequent re-exposure to stress on**  
3 **neuronal activity in the lateral habenula**

4

5 **Jack F. Webster<sup>1</sup>, Sanne Beerens<sup>1</sup> & Christian Wozny<sup>1,2</sup>**

6

7 1 Strathclyde Institute for Pharmacy and Biomedical Sciences, University of  
8 Strathclyde, Glasgow, G4 0RE, United Kingdom

9 2 MSH Medical School Hamburg, Medical University, Institute for Molecular Medicine,  
10 20457 Hamburg, Germany

11

12 For correspondence: [christian.wozny@medicalschooll-hamburg.de](mailto:christian.wozny@medicalschooll-hamburg.de)

13

14 **Abstract**

15 Early life stress can result in depression in humans and depressive-like behaviour in  
16 rodents. In various animal models of depression, the lateral habenula (LHb) has been  
17 shown to become hyperactive immediately after early life stress. However, whether  
18 these pathological changes persist into adulthood is less well understood. Hence, we  
19 utilised the maternal separation (MS) model of depression to study how early life stress  
20 alters LHb physiology and depressive behaviour in adult mice. We find that only a  
21 weak depressive phenotype persists into adulthood which surprisingly is underpinned  
22 by LHb hypoactivity in acute slices, accompanied by alterations in both excitatory and  
23 inhibitory signalling. However, while we find the LHb to be less active at rest, we report  
24 that the neurons reside in a sensitised state where they are more responsive to re-  
25 exposure to stress in adulthood in the form of acute restraint, thus priming them to  
26 respond to aversive events with an increase in neuronal activity mediated by changes  
27 in glutamatergic transmission. These findings thus suggest that in addition to LHb  
28 hyperactivity, hypoactivity likely also promotes an adverse phenotype. Re-exposure to  
29 stress results in the reappearance of LHb hyperactivity offering a possible mechanism  
30 to explain how depression relapses occur following previous depressive episodes.

## 31 **Introduction**

32 The lateral habenula (LHb) is an evolutionarily conserved brain structure located within  
33 the epithalamus which encodes aversive events (Matsumoto and Hikosaka, 2007;  
34 Lecca *et al.*, 2017), and depressive behaviour (Li *et al.*, 2011; Yang *et al.*, 2018; Hu *et al.*,  
35 2020; Zheng *et al.*, 2022). Specifically, the LHb becomes hyperactive in depression  
36 (Li *et al.*, 2011; Lecca *et al.*, 2016; Tchenio *et al.*, 2017; Cui *et al.*, 2018; Yang *et al.*,  
37 2018), thus enhancing output to the midbrain reward circuitry, for which the LHb acts  
38 as an inhibitory modulator (Wang and Aghajanian, 1977; Ji and Shepard, 2007; Jhou  
39 *et al.*, 2009).

40 Indeed, many studies have employed the use of a variety of different animal models  
41 of depressive behaviour including chronic mild stress (Cerniauskas *et al.*, 2019),  
42 chronic restraint stress (Yang *et al.*, 2018; Zheng *et al.*, 2022), social defeat (Golden  
43 *et al.*, 2016; Knowland *et al.*, 2017), learned helplessness (Li *et al.*, 2011) and various  
44 models of early life stress (Tchenio *et al.*, 2017; Authement *et al.*, 2018; Simmons *et al.*,  
45 2020; Langlois *et al.*, 2022), and have independently reached this conclusion that  
46 the LHb becomes hyperactive in depression. However, the majority of these studies  
47 have carried out experimentation shortly after exposure to the relevant stressor, and  
48 as such there is comparatively little evidence as to the long-term persistence of  
49 depressive phenotype, and the corresponding synaptic and physiological alterations  
50 within the LHb (Langlois *et al.*, 2022).

51 Hence, in this study we aimed to assess how early life stress in the form of maternal  
52 separation influences depressive behaviour, and alters lateral habenular physiology  
53 and synaptic connectivity in adult mice. Furthermore, we then sought to ask how early  
54 life stress influences subsequent re-exposure to stress in adulthood.

55

## 56 **Materials and methods**

### 57 **Animals and maternal separation procedure**

58 All procedures were approved by the Ethics committee of the University of Strathclyde,  
59 Glasgow, and carried out in accordance with the relevant UK legislation (the Animals  
60 (Scientific Procedures) Act, 1986). Male and female mice from each strain were used  
61 in this work, and unless otherwise stated, data were pooled between genders. Mouse  
62 strains used in this study were C57BL/6J, SOM-IRES-Cre heterozygous mutants (Jax  
63 ID 018973; Taniguchi *et al.*, 2011), and their wild-type littermates. All animals were  
64 kept on a 12:12 light/dark cycle under standard group housing conditions with  
65 unlimited access to water and normal mouse chow, unless otherwise stated.

66 The maternal separation (MS) procedure was adapted from a previously published  
67 protocol (Tchenio *et al.*, 2017). Pregnant females were housed individually, and date  
68 of littering was counted as postnatal day 0 (P0). Litters of 5-10 pups were used for  
69 these procedures. At P6, the litter was divided into even ( $\pm 1$  pups) groups of MS and

70 control (CTRL) pups. MS pups were then separated from the mother into individually  
71 isolated compartments in a heated cage in a separate room for 6 hours per day from  
72 P6-16, and then weaned early at P17. Separation started each day between 08:00  
73 and 10:00. CTRL pups remained with the mother and were weaned at P21. At the  
74 early weaning age of the MS pups (P17), they are often unable to consume normal  
75 mouse chow, and as such we provided them with human baby food for the final 2 days  
76 of MS to allow them to habituate to this. This was then provided for several days post  
77 weaning for both MS and CTRL mice to allow them to rapidly develop to the point  
78 where they could be sustained on normal mouse chow. Following weaning, both  
79 groups were then group housed (2-5 mice per cage) and allowed to develop to  
80 adulthood when further testing commenced.

81

## 82 **Behavioural testing and acute restraint procedure**

83 Mice underwent behavioural testing at approximately 8-10 weeks, and were single  
84 housed for these experiments. 3 behavioural tests were implemented in this study.  
85 These were sucrose preference, the open field test, and the splash test. Mice were  
86 then returned to group-housing conditions upon completion of behavioural testing.

87 *Sucrose preference.* Mice were first single housed, and then were given a choice  
88 between 2 bottles of water to habituate them to having 2 spouts in the cage. The  
89 following day (Day 1), both bottles were refilled and replaced. The left bottle again  
90 contained water, and the right bottle was filled with 1 % sucrose solution. On the third  
91 day (Day 2), bottles were refilled and replaced, this time with the 1 % sucrose solution  
92 bottle on the left, and water on the right. On the final day (Day 3), the positions of the  
93 bottles were pseudorandomised such that they alternated between cages. For all  
94 days, bottles were weighed before being added to the cage and again 24 hours later,  
95 and the consumption of fluid from each was used to calculate sucrose preference.

96 *Open field test.* Open field testing was carried out the day following the completion  
97 of sucrose preference testing. Mice were put in a white square arena (40 x 40 x 35  
98 cm) within a room with standard lighting conditions, and allowed to freely explore for  
99 5 minutes. Activity was recorded using an overhead camera, and videos were  
100 analysed using the analysis programme ToxTrac (Rodriguez *et al.*, 2018), with the  
101 outermost 5 cm of the arena being classed as the borders.

102 *Splash test.* Splash test was carried out on the same day as open field testing, at  
103 least 2 hours after completion of this test. This was carried out in the home cage. 30  
104 minutes prior to testing, all environmental enrichment (nesting material and plastic  
105 house) was removed from the home cage. Mice were then sprayed once on the dorsal  
106 coat with a solution of 10 % sucrose. To avoid the scent of sucrose distracting the  
107 animals during testing, mice were sprayed outside of the home cage. The mouse was  
108 then immediately returned to the home cage, the lid replaced, and activity recorded  
109 for 5 minutes using an overhead camera. Analysis was performed using the analysis  
110 programme BORIS (Friard and Gamba, 2016).

111 *Acute restraint.* Mice were restrained within modified handling tubes for a period of  
112 1 hour. Upon completion of the acute restraint procedure, mice were either  
113 immediately sacrificed by cervical dislocation for preparation of acute brain slices, or  
114 returned to the home cage for 1 hour before transcardial paraformaldehyde (PFA)  
115 perfusion to assess c-Fos expression. Mice that were to be sacrificed for brain slice  
116 preparation immediately after restraint remained in group-housing conditions. Mice  
117 that were to undergo PFA perfusion were single-housed for at least 2 days prior to  
118 restraint.

119 *Behavioural Z scoring.* Behavioural Z scores were calculated as previously  
120 described (Guilloux *et al.*, 2011). Briefly, a normalised Z score was calculated for each  
121 of the following 7 behavioural readouts: sucrose preference on days 1, 2 and 3;  
122 percentage time spent in borders in the open field test and; percentage time spent  
123 grooming, latency to first grooming bout and time rearing in the splash test.  
124 Behavioural Z scores were then calculated as the average of these 7 Z scores for each  
125 individual animal.

126

#### 127 **Stereotaxic viral injections.**

128 SOM-IRES-Cre heterozygous mice (approximately 8-9 weeks old) were deeply  
129 anaesthetized via inhaled isoflurane (5% for induction; 1–2% for maintenance),  
130 transferred to a stereotaxic frame (Narishige, Tokyo, Japan) and were subcutaneously  
131 injected with the analgesics carprofen (5 mg/kg) in the nape and lidocaine (4 mg/kg)  
132 under the scalp. Intracranial injections were made using a glass micropipette pulled  
133 using a PC-100 vertical puller (Narishige, Tokyo, Japan). Under aseptic conditions,  
134 the skull was exposed and a small burr hole was drilled bilaterally above the basal  
135 forebrain (BF). Stereotaxic coordinates (from Bregma) were as follows: AP 0.45;  $\pm 1.3$ ;  
136 depth 5.8. The injection capillary was then advanced and viral vector solutions were  
137 injected at a rate of 100 nL/min using a pressure microinjector (Narishige, Tokyo,  
138 Japan). Viral vector solutions used in this study were AAV9-EF1a-DIO-  
139 hChR2(H134R)-EYFP, titre  $1.8 \times 10^{13}$  vg/mL, 200 nL; AAV9-pCAG-FLEX-EGFP-  
140 WPRE, titre  $2.5 \times 10^{13}$  vg/mL, 100 nL injected (both from Addgene, Massachusetts,  
141 US). Following injection, the needle was left for at least 10 minutes to allow the virus  
142 to diffuse before being slowly withdrawn. Animals were allowed to recover from  
143 anaesthesia on a heat pad. Following completion of surgery, animals were given at  
144 least two weeks to allow expression of the virus before acute slice preparation for  
145 electrophysiology. Assessment of viral spread was carried out using either a  
146 fluorescent camera (Olympus XM10; Olympus, Southend-on-Sea, UK) with a 4X  
147 objective, or a Leica SP8 confocal microscope.

## 148 **Acute brain slice preparation**

149 Mice were humanely euthanized by cervical dislocation and immediately decapitated,  
150 and brains were rapidly removed and transferred to ice-cold oxygenated (95% O<sub>2</sub>; 5%  
151 CO<sub>2</sub>) sucrose-based artificial cerebrospinal fluid (ACSF) solution containing (in mM):  
152 sucrose 50, NaCl 87, NaHCO<sub>3</sub> 25, KCl 3, NaH<sub>2</sub>PO<sub>4</sub> 1.25, CaCl<sub>2</sub> 0.5, MgCl<sub>2</sub> 3, sodium  
153 pyruvate 3 and glucose 10. Brains sections containing the lateral habenula were then  
154 cut in the coronal plane at 250 μm where *in vitro* optogenetic experiments were to be  
155 performed, or 300 μm for all other slice experiments, on a Leica VT1200S vibratome  
156 (Leica Biosystems, Newcastle-upon-Tyne, UK). Following sectioning, slices were  
157 incubated in oxygenated sucrose-based ACSF at 35 °C for 30 minutes, and then  
158 incubated for a further 30 minutes at room temperature in ACSF containing (in mM)  
159 NaCl 115, NaHCO<sub>3</sub> 25, KCl 3, NaH<sub>2</sub>PO<sub>4</sub> 1.25, CaCl<sub>2</sub> 2, MgCl<sub>2</sub> 1, sodium pyruvate 3  
160 and glucose 10. Following the incubation period, slices were stored at room  
161 temperature in oxygenated ACSF until required for electrophysiological recordings.

162

## 163 ***In vitro* electrophysiological recordings**

164 Individual slices were transferred to a recording chamber and continually perfused with  
165 oxygenated ACSF at a flow rate of 2–3 mL/min and visualized with a Luigs and  
166 Neumann LN-Scope System (Luigs and Neumann, Ratingen, Germany). Neurons  
167 suitable for whole-cell recordings were identified under a 60X objective. For transgenic  
168 animals which expressed a fluorescent reporter protein (eGFP or eYFP), fluorescent  
169 reporters were excited using a LED coupled through the 60X objective (pE-300ultra,  
170 Cool LED, Andover, UK), and reporter-expressing somata or terminal fields were  
171 visualized with an Olympus XM10 fluorescent camera (Olympus, Southend-on-Sea,  
172 UK). Recordings were made with a Multiclamp 700B Amplifier (Molecular Devices,  
173 California, USA). For current clamp recordings, and for recording optogenetically-  
174 driven postsynaptic currents, glass micropipettes were filled with a solution containing  
175 (in mM) potassium gluconate 125, Hepes 10, KCl 6, EGTA 0.2, MgCl<sub>2</sub> 2, Na-ATP 2,  
176 Na-GTP 0.5, sodium phosphocreatine 5, and with 0.2% biocytin, and pH was adjusted  
177 to 7.2 with KOH. For spontaneous postsynaptic current measurement experiments, a  
178 potassium chloride-based intracellular solution was used consisting of (in mM)  
179 potassium chloride 145, EGTA 0.1, Hepes 10, NaATP 2 and MgCl<sub>2</sub> 2, pH adjusted to  
180 7.2. To pharmacologically isolate inhibitory currents, these experiments were  
181 performed in the presence of AMPA and NMDA receptor blockade (10 μM NBQX and  
182 50 μM D-AP5 respectively; Tocris, Bristol, UK). To isolate excitatory currents,  
183 experiments were performed in the presence of GABA<sub>A</sub> and GABA<sub>B</sub> blockade (5 μM  
184 SR-95531 and 10 μM CGP-52432 respectively; Tocris, Bristol, UK).

185 For current clamp recordings, a gigaseal was first achieved in voltage-clamp  
186 configuration when the pipette was in the immediate vicinity of the neuron. The neuron  
187 was then held at a potential of -60 mV, and whole-cell configuration was achieved by  
188 rupturing the membrane with a series of negative pressure pulses. Once in whole-cell

189 patch mode, the intrinsic properties of LHb neurons were assessed by switching to  
190 current-clamp configuration ( $I = 0$ ) and recording spontaneous activity for a period of  
191 2-3 minutes. Neurons which fired action potentials with a frequency of at least 0.5 Hz  
192 were classed as spontaneously active. Following spontaneous activity recording,  
193 current-spike input-output relationships were tested by injecting sufficient holding  
194 current to hold the neuron at a potential of -55 mV, and a series of depolarising current  
195 steps were injected (0-100 pA; 10 pA steps). Holding current was then removed, and  
196 a second series of current steps were injected (-50-100 pA; 10 pA steps) to assess  
197 both rebound bursting properties, and spiking properties at rest.

198 For optogenetically-driven postsynaptic inhibitory current recordings, whole-cell  
199 configuration was achieved as above, and recordings were performed in voltage-  
200 clamp configuration at a holding potential of -50 mV. During recording, a single blue  
201 LED pulse (1 ms) of increasing intensity (1-50%; 3-4 trials per intensity) was applied  
202 to induce a postsynaptic current, with the amplitude being measured as an average of  
203 3 trials. Upon completion of these experiments, the same neurons were then held in  
204 current clamp configuration to assess both physiological properties, and the capacity  
205 for optogenetically-driven inhibitory synaptic transmission to induce rebound bursting.

206 For spontaneous current measurements, whole-cell configuration was achieved at  
207 -70 mV, and spontaneous synaptic activity was recorded for a period of 2 minutes. For  
208 these experiments, recordings were completed no more than 4 minutes after break-  
209 in, as we observed rapid reduction in synaptic event frequency using the  
210 aforementioned high chloride intracellular solution.

211 Series resistance was monitored throughout. All neuronal voltage and current  
212 signals were low pass-filtered between 2 and 10 kHz and acquired between 10 and  
213 25 kHz using an ITC-18 digitizer interface (HEKA, Pfalz, Germany). The data  
214 acquisition software used was Axograph X.

215

## 216 **Transcardial perfusion and sectioning**

217 Mice were terminally anaesthetized by intraperitoneal injection with an overdose  
218 cocktail of 50% lidocaine and 50% pentobarbital. Once anaesthetized sufficiently to  
219 be non-responsive to tail and toe pinch stimuli, mice were perfused through the left  
220 ventricle with 0.1 M PBS followed by perfusion with 4% PFA dissolved in PBS. Brains  
221 were then removed and fixed overnight in 4% PFA in PBS, after which they were  
222 cryoprotected in a solution containing 30% sucrose in PBS. Brains were left in this  
223 solution until they dropped to the bottom of the tube, at which point the 30% sucrose  
224 solution in PBS was replaced with fresh 30% sucrose solution. Once the brain dropped  
225 for a second time, it was considered ready for sectioning. This was performed by  
226 embedding in OCT compound (VWR, Leicestershire, UK) and freezing with a dry ice  
227 bath. Once frozen, brains were sectioned on a Leica SM2010 R microtome (Leica  
228 Biosystems, Newcastle-upon-Tyne, UK) at 50 - 60  $\mu\text{m}$ .

## 229 **Immunohistochemistry and confocal imaging**

230 Following sectioning, slices were washed 3 times in 0.1 M PBS, and then incubated  
231 for 30 minutes in a blocking solution consisting of 5% normal goat serum (NGS) and  
232 0.3% Triton X-100. Blocking solutions was then removed, and slices were incubated  
233 on a shaker at room temperature overnight in a primary antibody mixture containing  
234 0.3% Triton in PBS and rabbit anti-c-Fos (1/10000; ab190289; Abcam, Cambridge,  
235 UK). Upon completion of the primary incubation step, slices were washed 2 × 5  
236 minutes in 0.1 M PBS and incubated for 3 hours in a solution containing donkey anti-  
237 rabbit conjugated to Alexa Fluor 647 (1/500 dilution; Invitrogen, UK). After secondary  
238 antibody incubation, slices were washed for 3 times in 0.1 M PBS and mounted on  
239 glass slides using Vectashield medium containing DAPI (Vector Labs, Peterborough,  
240 UK).

241 Slices were imaged on a Leica SP8 confocal microscope using a 20X objective at  
242 3 different points from Bregma along the rostrocaudal axis, spaced approximately 300  
243  $\mu\text{m}$  apart. For these experiments, imaging was performed with a 633 nm laser at 1 %  
244 max intensity, 2  $\mu\text{m}$  z-steps.

245

## 246 **Statistical analysis**

247 Statistical analysis was carried out in GraphPad Prism 9.3.1. For pairwise  
248 comparisons, an unpaired T test was used where at least one data set was found to  
249 be normally distributed (tested with a Shapiro-Wilk normality test). Where both sets of  
250 data failed a normality test, a Mann-Whitney test was used.

## 251 Results

### 252 Early life stress induces mild depressive symptoms in adult mice, and alters 253 LHb physiology

254 We first sought to validate that MS for 6 hours per day with early weaning (methods)  
255 can induce depressive behaviour in adult mice. Hence, following MS, mice were  
256 allowed to develop to adulthood ( $\approx$  8-10 weeks of age), when they underwent  
257 behavioural testing. Mice were subjected to a series of 3 behavioural paradigms to  
258 test for anhedonia, anxiety-like behaviour and motivation which were sucrose  
259 preference, the open field test and the splash test respectively (Fig. 1A; N = 37 CTRL;  
260 N = 39 MS mice). Sucrose preference testing was carried out over 3 consecutive days,  
261 and indeed we saw a reduction in sucrose preference in MS mice over these 3 days  
262 (Fig. 1B;  $p = 0.038$ ; 2-way ANOVA column factor). However, a particularly striking  
263 effect was that this deficit was most prominent on day 2 of testing ( $p = 0.028$ ; Sidak's  
264 test). This was an interesting observation, as on day 2 of our paradigm, we switched  
265 the position of the sucrose and water bottles (Methods), hence suggesting that our  
266 model also induces a possible deficit in reversal learning (Baker and Mizumori, 2017).  
267 We did not observe any change in anxiety-like behaviour (Fig. 1Ci;  $p = 0.670$ ; unpaired  
268 T-test), locomotor activity (Fig. 1Cii;  $p = 0.593$ ; unpaired T-test) or motivation (Fig. 1Di;  
269  $p = 0.286$ ; unpaired T-test). However, MS mice exhibited an increased latency to first  
270 grooming bout in the splash test (Fig. 1Dii;  $p = 0.050$ ; Mann-Whitney test), and  
271 interestingly spent more time rearing in the splash test (Fig. 1Diii;  $p = 0.020$ ; unpaired  
272 T-test), which may be indicative of social contact seeking (Fukumitsu *et al.*, 2022). To  
273 account for variability between behavioural tests within individual mice, we also  
274 calculated an integrated Z score (Methods and Guilloux *et al.*, 2011), which gives an  
275 arbitrary score of emotionality for each mouse, by normalising and integrating readouts  
276 from each behavioural test. This indeed revealed that MS mice had overall greater  
277 emotionality than CTRL mice (Fig. 1E;  $p = 0.019$ ; unpaired T-test). However, overall  
278 these results led us to conclude that the observed phenotype was relatively mild in the  
279 adult mice.



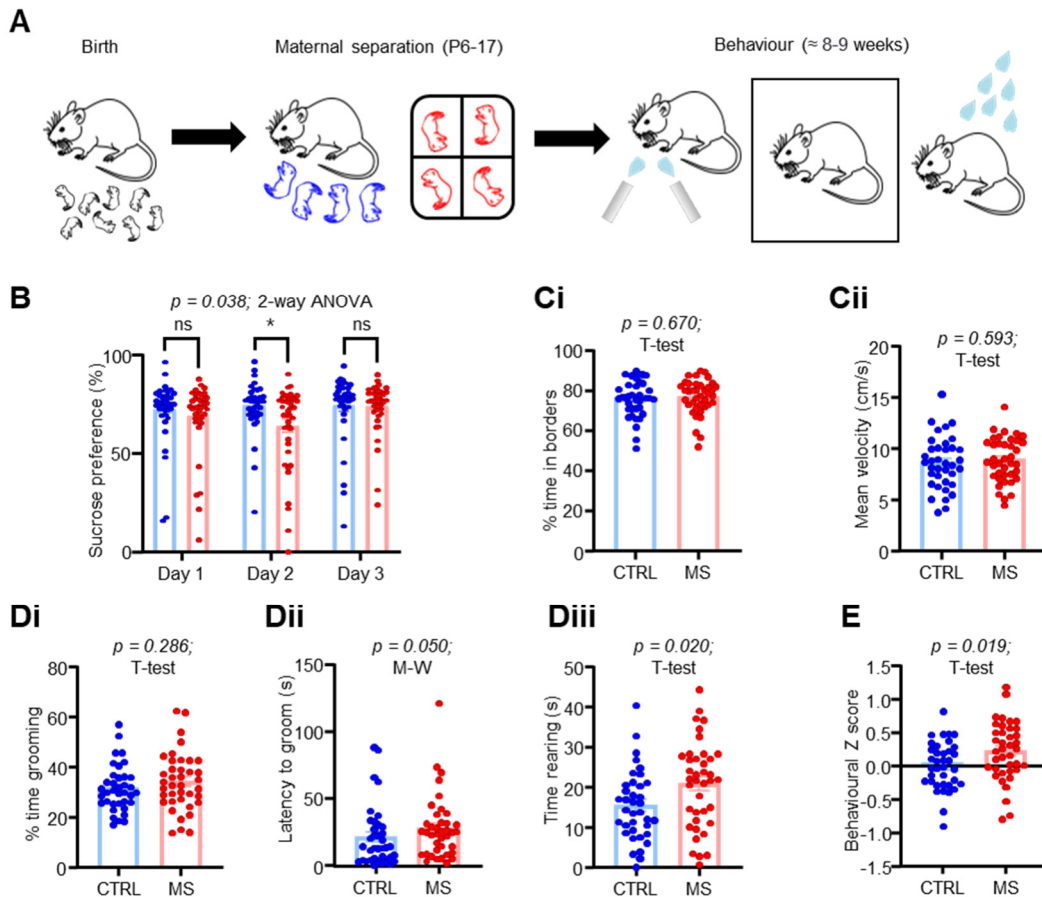

280

281

**Figure 1: MS induces a mild depressive-like phenotype in adult mice.**

282

283

284

285

286

287

288

289

290

291

292

293

294

295

296

297

298

299

300

We next sought to assess how MS altered LHb neuronal physiology. Mice were sacrificed shortly after behavioural testing, and whole-cell recordings were carried out in acute brain slices (Fig. 2A;  $n/N = 36/6$  CTRL;  $n/N = 39/6$  MS neurons / mice). MS induced no changes in passive physiological properties (Fig. S1A; input resistance  $p = 0.984$ ; unpaired T-test; and resting membrane potential  $p = 0.235$ ; Mann-Whitney test), and induced only a weak trend towards an increase in intrinsic excitability (Fig. S1B;  $p = 0.083$ ; 2-way ANOVA column factor). However, the most striking difference we observed was a reduction in spontaneous neuronal activity (Fig. 2Bi and Bii;  $p = 0.0009$ ; Chi-square test), which appeared to be specific for tonically active neurons. This was an interesting observation as bursting activity of LHb neurons is believed to be the primary driver of depressive behaviour (Yang *et al.*, 2018; Zheng *et al.*, 2022).

301 Moreover, of those neurons which were spontaneously active, we observed that they  
 302 were active at a lower frequency following MS (Fig. 2Bii;  $p = 0.014$ ; Mann-Whitney  
 303 test). We also observed no difference in sag potential between conditions (Fig. 2Ci  
 304 and Cii;  $p = 0.678$ ; 2-way ANOVA column factor). However, although neurons from  
 305 MS mice did not display more bursting activity at rest, we found that they did fire  
 306 rebound bursts with a reduced latency following hyperpolarising current injection (Fig.  
 307 2Di and Dii;  $p < 0.0001$ ; 2-way ANOVA column factor), leading us to speculate that  
 308 the neurons may be in a state where they are more primed to fire in response to  
 309 synaptic input. Hence, we also recorded spontaneous excitatory postsynaptic currents  
 310 (sEPSC's) in a separate cohort of mice (Fig. S2;  $n/N = 44/4$  CTRL;  $n/N = 46/4$  MS  
 311 neurons / mice). We did not observe any differences in frequency (Fig. S2Ai;  $p = 0.342$ ;  
 312 Mann-Whitney test) but did observe a slight but significant reduction in current  
 313 amplitude following MS (Fig. S2Ai;  $p = 0.012$ ; Mann-Whitney test). However, this  
 314 dataset was likely confounded by the fact that the CTRL mice for this particular cohort  
 315 appeared to display a phenotype more similar to the MS mice than other CTRL mice,  
 316 and as such we attempted to account for this by plotting the behavioural Z score of  
 317 each mouse against the mean sEPSC frequency for all cells recorded from each  
 318 individual mouse (Fig. S2B). Indeed, when we did this we observed a negative  
 319 correlation between Z score and mean sEPSC frequency (Fig. S2B;  $p = 0.016$ ; simple  
 320 linear regression), indicating that mice which existed in a more depressed state  
 321 apparently exhibited reduced excitatory drive onto Lhb neurons. Altogether, these  
 322 results point to a scenario whereby MS reduces spontaneous firing of Lhb neurons in  
 323 brain slices, possibly by reducing presynaptic excitatory drive.

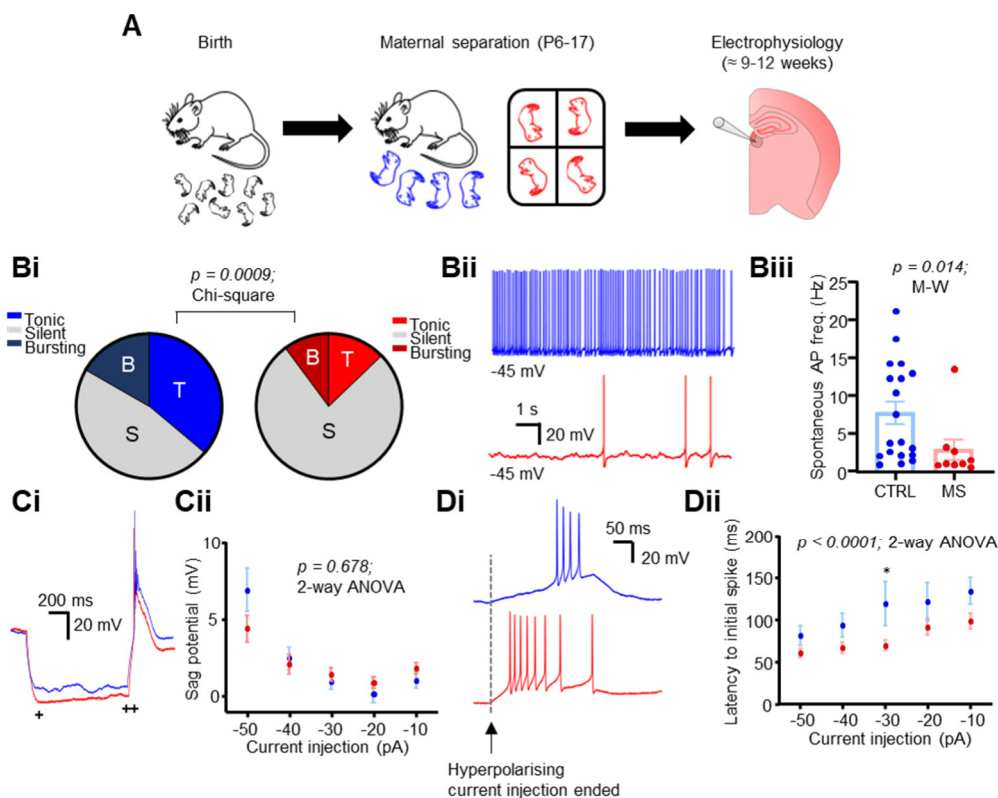

324

325 **Figure 2: MS alters LHb neuronal physiology in adult mice.**

326 (A) Schematic illustrating experimental timeline. (B) Spontaneous activity  
327 comparison for both conditions. (Bi) Pie charts depicting fractions of  
328 recorded neurons which were classed as spontaneously active  
329 (spontaneous AP discharge > 0.5 Hz). (Bii) Example spontaneous activity  
330 recordings from both conditions. (Biii) Comparison plot of mean  
331 spontaneous activity frequency, for neurons which were spontaneously  
332 active (>0.5 Hz frequency). (Ci) Example traces and (Cii) plot of input  
333 current against sag potential in both conditions. Sag potential was  
334 calculated as the difference of the peak (+) and the steady state (++) of the  
335 membrane hyperpolarisation induced in response to hyperpolarising current  
336 steps. (Di) Example traces of rebound bursts induced in both conditions  
337 following hyperpolarising current injection. (Dii) Plot of input current against  
338 latency to initial spike of the rebound burst induced upon current step end.

339

340 **MS weakens inhibitory synaptic transmission onto LHb neurons**

341 Multiple other works have shown that a reduction in inhibitory signalling is associated  
342 with a depressive phenotype (Shabel *et al.*, 2014; Lecca *et al.*, 2016; Tchenio *et al.*,  
343 2017), and as such we sought to test how MS influenced inhibitory signalling in adult  
344 mice. We first recorded spontaneous IPSCs (sIPSCs) throughout the LHb in acute  
345 slices (Fig. 3; n/N = 46/6 CTRL; n/N = 49/6 MS neurons / mice). We observed no  
346 overall difference in either frequency (Fig. 3A;  $p = 0.296$ ; Mann-Whitney test) or  
347 amplitude (Fig. 3A;  $p = 0.245$ ; Mann-Whitney test). However, we did observe a striking  
348 gradient across the mediolateral axis of the LHb in CTRL mice (Fig. 3Bi and Bii;  $p =$   
349  $0.005$ ; simple linear regression) with sIPSC frequency being greatest in the medial  
350 LHb, which was not present in MS mice (Fig. 3Bi and Bii;  $p = 0.325$ ; simple linear  
351 regression). This thus lead us to suspect that there may be subregional differences in  
352 spontaneous inhibitory synaptic input to LHb neurons. Indeed, when we broke our  
353 analysis down into the medial (< 0.45 mm from midline) and lateral (> 0.45 mm from  
354 midline) LHb sub-regions, we observed a reduction in sIPSC frequency specifically in  
355 the medial LHb (Fig. 3Bii;  $p = 0.048$ ; Mann-Whitney test). Furthermore, we found that  
356 there was a negative correlation of the behavioural Z score with IPSC frequency (Fig.  
357 3C;  $p = 0.013$ ; simple linear regression), thus suggesting that more depressed animals  
358 exhibited lower levels of inhibitory synaptic drive. Overall, these results suggest that  
359 MS results in a reduction in spontaneous inhibitory input, specifically in the medial  
360 LHb.

361

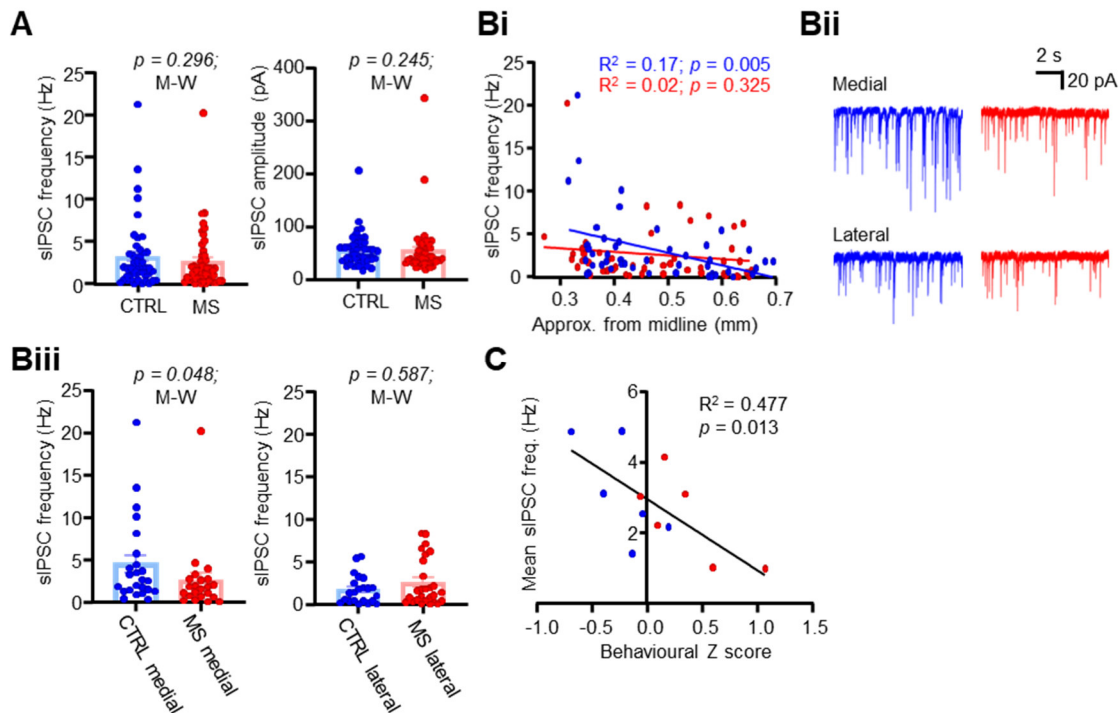

362

363

364

365

**Figure 3: MS induces loss of spontaneous inhibitory input in the medial LHb.**

366

367

368

369

370

371

372

373

374

375

376

377

378

379

380

381

382

383

384

385

In our previous work we reported on a strong inhibitory projection to the LHb which appeared to arise from somatostatin-positive (SOM) neurons in the ventral pallidum of the basal forebrain (Webster *et al.*, 2020). Other work has shown that excitatory pallidal projections to the LHb can promote depressive behaviour (Knowland *et al.*, 2017), and that inhibitory LHb-projecting pallidal projections promote reward (Stephenson-Jones *et al.*, 2020). As such, we hypothesised that inhibitory drive onto the LHb from SOM-positive pallidal neurons may be lost following MS. We tested this by injecting a Cre-dependent virus encoding channelrhodopsin (ChR2) into the basal forebrain of SOM-Cre mice and recorded light-induced postsynaptic events in LHb neurons (Fig. 4A; n/N = 18/4 CTRL; n/N = 20/ 4 MS neurons / mice). Optogenetic

386 stimulation induced inhibitory postsynaptic events in similar fractions of neurons in  
387 both CTRL and MS mice (Fig. 4B;  $p = 0.59$ ; Chi square test). We first recorded  
388 inhibitory currents induced following a single 1 ms pulse at various intensities, and  
389 tested for differences between CTRL and MS mice by fitting a one-phase association  
390 exponential curve to each dataset (Libovner *et al.*, 2020). CTRL and MS groups were  
391 found to have very different curve fits (Fig. 4Bi;  $p < 0.0001$ ; non-linear curve fit), which  
392 specifically was found to be a reduction in the curve plateau for MS mice (Fig. 4Bi and  
393 Bii;  $p = 0.03$ ; non-linear curve fit), thus suggesting a reduction in postsynaptic current  
394 amplitude without a corresponding change in kinetics. We also tested presynaptic  
395 release probability in current clamp configuration and observed no differences (Fig.  
396 4C;  $p = 0.457$ , 2-way ANOVA). However, an interesting observation was that in a sub-  
397 fraction of responsive neurons, the inhibitory drive was found to be strong enough to  
398 induce rebound firing (Fig. S3A and B), which interestingly was observed to be  
399 strongest at 10 Hz stimulation frequency (Fig. S3C).

400 Altogether, the above observations indicate a weakening of inhibitory synaptic  
401 drive from inhibitory SOM-positive pallidal forebrain neurons onto LHb neurons  
402 following MS. Due to the observed change in plateau without corresponding change  
403 in rise constant of the curve (Fig. 4Bii), and the apparent lack of change in presynaptic  
404 release probability (Fig. 4C), the case could be made that this may be due to a down-  
405 regulation of postsynaptic GABA receptors. However, this doesn't innately rule out a  
406 change in the intrinsic excitability of the presynaptic neurons. As such, we aimed to  
407 test this by recording from presynaptic SOM-positive pallidal neurons. We first injected  
408 a retrograde Cre-dependent virus encoding tdTomato into the LHb of SOM-Cre mice.  
409 However, while we could clearly observe terminals in the LHb, and tdTomato-positive  
410 soma in the entopeduncular nucleus, where SOM-positive neurons project to the LHb,  
411 labelling in the entire basal forebrain region was very sparse (data not shown). Instead,  
412 we therefore injected a Cre-dependent anterograde virus encoding eGFP into the  
413 basal forebrain and recorded from putative presynaptic eGFP-positive neurons (Fig.  
414 4D;  $n/N = 35/4$  CTRL;  $n/N = 34/4$  MS neurons / mice). These neurons were found to  
415 be spontaneously active at a similar frequency within both conditions (Fig. 4Ei;  $p =$   
416  $0.977$ ; Mann-Whitney test) and had similar resting membrane potentials (Fig. 4Eii;  $p =$   
417  $0.865$ ; unpaired T-test). However, neurons from MS mice exhibited a reduction in input  
418 resistance (Fig. 4Eii;  $p = 0.031$ ; unpaired T-test), and a slight but statistically significant  
419 reduction in action potential firing following depolarising current injection (Fig. 4Fi and  
420 Fii;  $p = 0.040$ ; 2-way ANOVA column factor). Additionally, these neurons exhibited a  
421 strong reduction in sag potential (Fig. 4Gi and Gii;  $p < 0.0001$ ; 2-way ANOVA column  
422 factor). Hence, all of these observations point to a reduction in excitability in SOM-  
423 positive pallidal neurons in adult mice following MS. Altogether with our optogenetic  
424 experiments, these results indicate that MS reduces inhibitory connectivity between  
425 the pallidum and forebrain via both pre- and postsynaptic modifications.

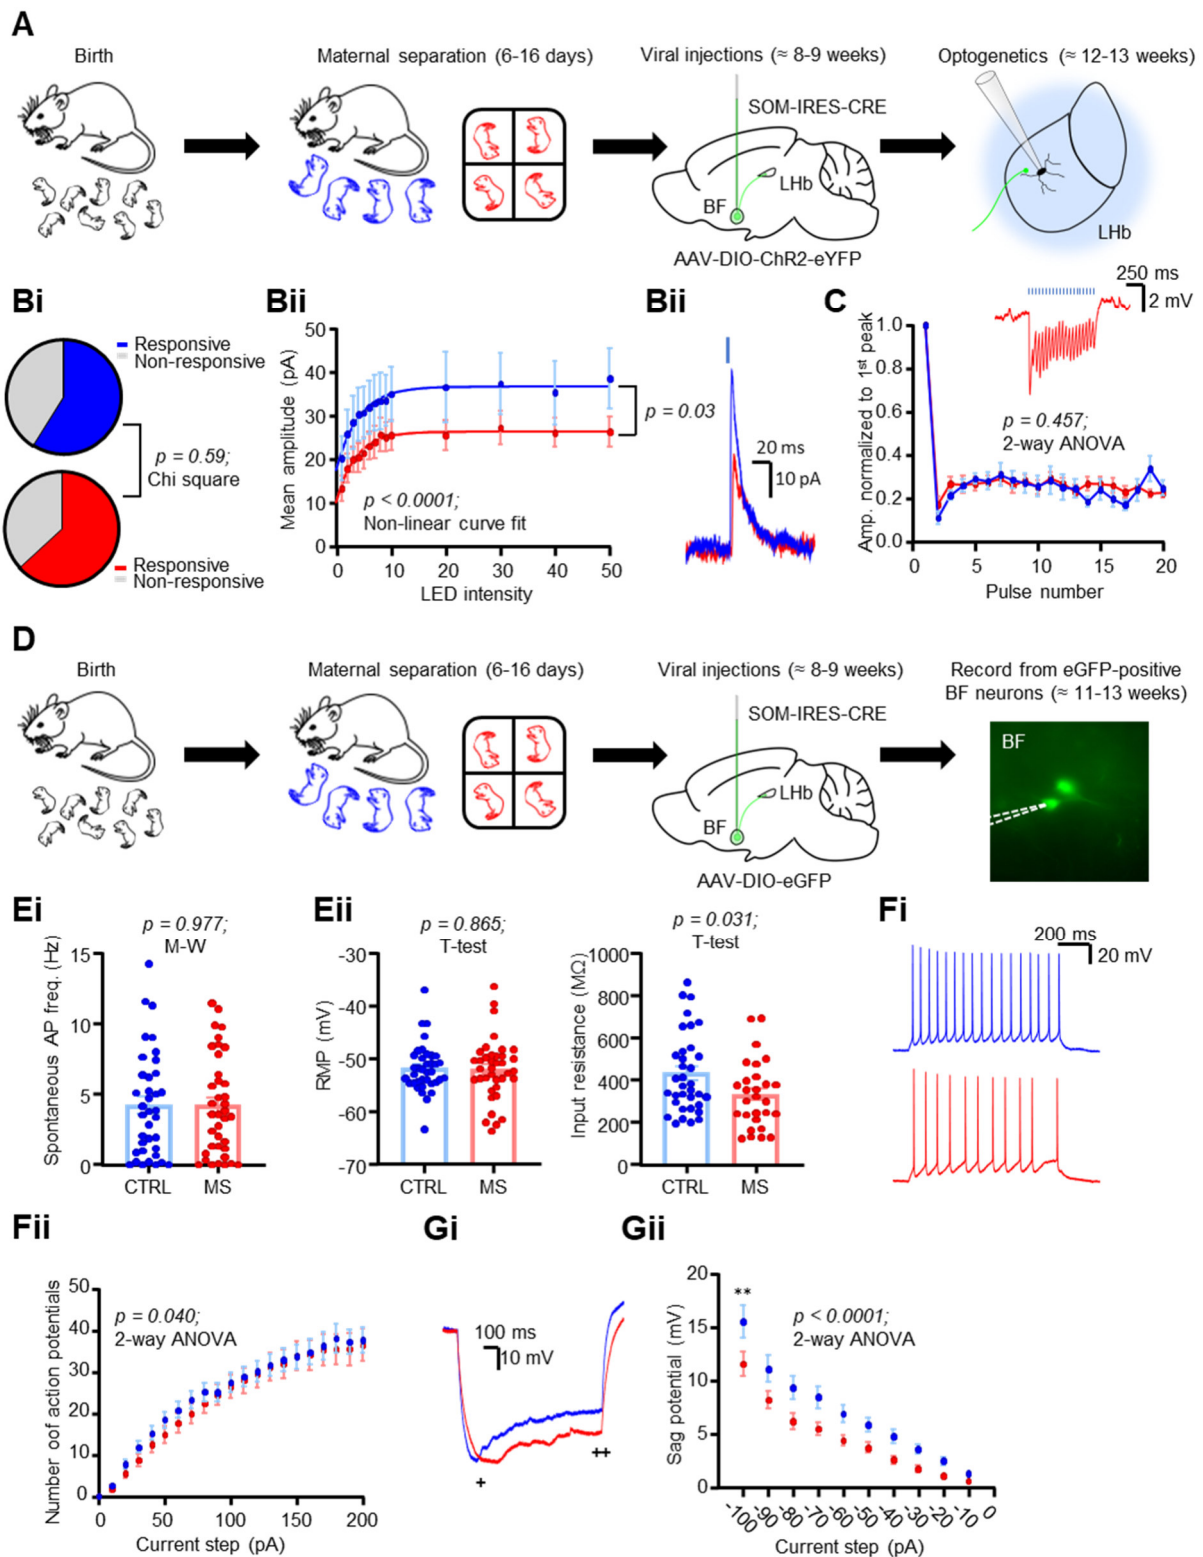

426

427

428 **Figure 4: MS weakens connectivity between inhibitory SOM-positive**  
 429 **basal forebrain neurons and the LHB.**

430 (A) Schematic illustrating experimental timeline for optogenetic  
 431 experiments. (Bi) Fraction of neurons responsive to LED stimulation in both

432 conditions. (Bii) Intensity-response curve of LED intensity plotted against  
433 mean peak amplitude of the oIPSC, with one phase exponential curve fitted  
434 for both conditions.  $P$  value is a comparison of plateaus from both fitted  
435 curves. (Biii) Example traces of oIPSCs from both conditions. (C) Plot of  
436 oIPSP peaks from 20 Hz LED stimulation normalised to the amplitude of the  
437 1<sup>st</sup> peak in each recording. Inset is an example recording from a neuron from  
438 an MS mouse. (D) Schematic illustrating experimental timeline for recording  
439 from putative presynaptic basal forebrain neurons. (Ei) Comparison plots of  
440 mean spontaneous activity frequency and of (Eii) passive physiological  
441 properties between neurons. (Fi) Example traces and (Fii) Input output plot  
442 of induced action potentials in response to depolarising current steps for  
443 both conditions. (Gi) Example traces and (Gii) plot of input current against  
444 sag potential in both conditions. Sag potential was calculated as the  
445 difference of the peak (+) and the steady state (++) of the membrane  
446 hyperpolarisation induced in response to hyperpolarising current steps.

447

#### 448 **MS sensitises LHb neurons to acute stress**

449 Thus far we have shown that MS induces a seemingly mild depressive phenotype  
450 within the adult mouse, which is accompanied by reduced activity within the LHb in  
451 slices and various synaptic alterations. While the changes we observed in inhibitory  
452 transmission (Figs. 3 and 4) appear to fit relatively well with the current literature, our  
453 data for the physiological properties of LHb neurons (Fig. 2) apparently goes against  
454 the central hypothesis that depression is driven by hyperactivity within the LHb.  
455 Referring again to our behavioural data, we speculated that a possible explanation for  
456 this may be that rather than being in a strongly depressed state as adults, the mice  
457 are in a state where they are only mildly depressed but rather do not respond  
458 particularly well to emotional challenge. Several observations led us to this hypothesis:  
459 firstly, the observation that the sucrose preference deficit is strongest on day 2 when  
460 the positions of the bottles are switched (Fig. 1B), which may indicate that the MS mice  
461 do not respond as well to changes in learned behaviours. Secondly, that the MS mice  
462 exhibited an increased latency to groom in the splash test (Fig. 1Dii). This is a  
463 reflection of the fact that the initial reaction of the mice to being sprayed with sucrose  
464 solution is to panic and flee, and the MS mice seemingly do this for longer and hence  
465 take longer to relax and start grooming. Thirdly, the observation that although not more  
466 spontaneously active at rest, the neurons from MS mice fire rebound bursts with a  
467 shorter latency (Fig. 2Di and Dii), possibly indicative that they are more primed to fire  
468 in response to synaptic drive.

469 To test this, we therefore submitted both CTRL and MS mice to an acute stressor  
470 in the form of 1 hour restraint, then immediately sacrificed them and performed acute  
471 slice recordings (Fig. 5A;  $n/N = 56/5$  CTRL;  $n/N = 51/5$  MS neurons / mice). As with  
472 our previous recordings, we observed no difference in passive physiological properties  
473 of LHb neurons (Fig. 5B; input resistance  $p = 0.958$ ; T-test; RMP  $p = 0.793$ ; Mann-

474 Whitney test). However, here we observed a more prominent increase in intrinsic  
475 excitability in MS neurons (Fig. 5C;  $p < 0.0001$ ; 2-way ANOVA column factor).  
476 Surprisingly, we observed a lesser difference in the latency to rebound burst, although  
477 still significant (Fig. 5D;  $p = 0.042$ ; 2-way ANOVA column factor). As hypothesised, we  
478 found that a greater fraction of the neurons from MS mice were spontaneously active  
479 at rest following acute restraint (Fig. 5Ei and Eii;  $p < 0.0001$ ; Chi square test).  
480 Moreover, although the average frequency of neurons which were spontaneously  
481 active was not found to be different (Fig. 5Eiii;  $p = 0.764$ ; Mann-Whitney test), neurons  
482 from the MS mice displayed a differing distribution of spontaneous activity frequencies  
483 (Fig. 5Eiv;  $p = 0.045$ ; Kolmogorov-Smirnov test). Interestingly, we also observed a  
484 trend towards a positive correlation between the behavioural Z score of the mice and  
485 the mean spontaneous activity frequency for each mouse (Fig. 5F;  $p = 0.063$ ; simple  
486 linear regression), indicating that the emotional state of the mouse is a reasonably  
487 valid predictor of the response of the LHb neurons to stress. We further tested our  
488 hypothesis that the LHb neurons are more sensitive to stress histologically, by  
489 quantifying expression of the immediate early gene cFos in a separate cohort of both  
490 CTRL and MS mice either with or without exposure to acute restraint (Fig. 5Gi and Gii;  
491  $n/N = 25/8$  CTRL;  $n/N = 27/9$  MS;  $n/N = 32/10$  CTRL restraint;  $n/N = 31/9$  MS restraint  
492 slices / mice). Restraint was able to reliably drive cFos expression in both CTRL and  
493 MS mice (Fig. 5Gi and Gii;  $p < 0.0001$ ; one-way ANOVA), with MS mice exhibiting  
494 greater numbers of cFos-positive neurons than CTRL mice following restraint (Fig.  
495 5Gi;  $p = 0.045$ ; Sidak's test) but not in non-restrained animals (Fig. 5Gi;  $p = 0.633$ ;  
496 Sidak's test), thus further confirming that LHb neurons in MS animals are more  
497 sensitised to stress.



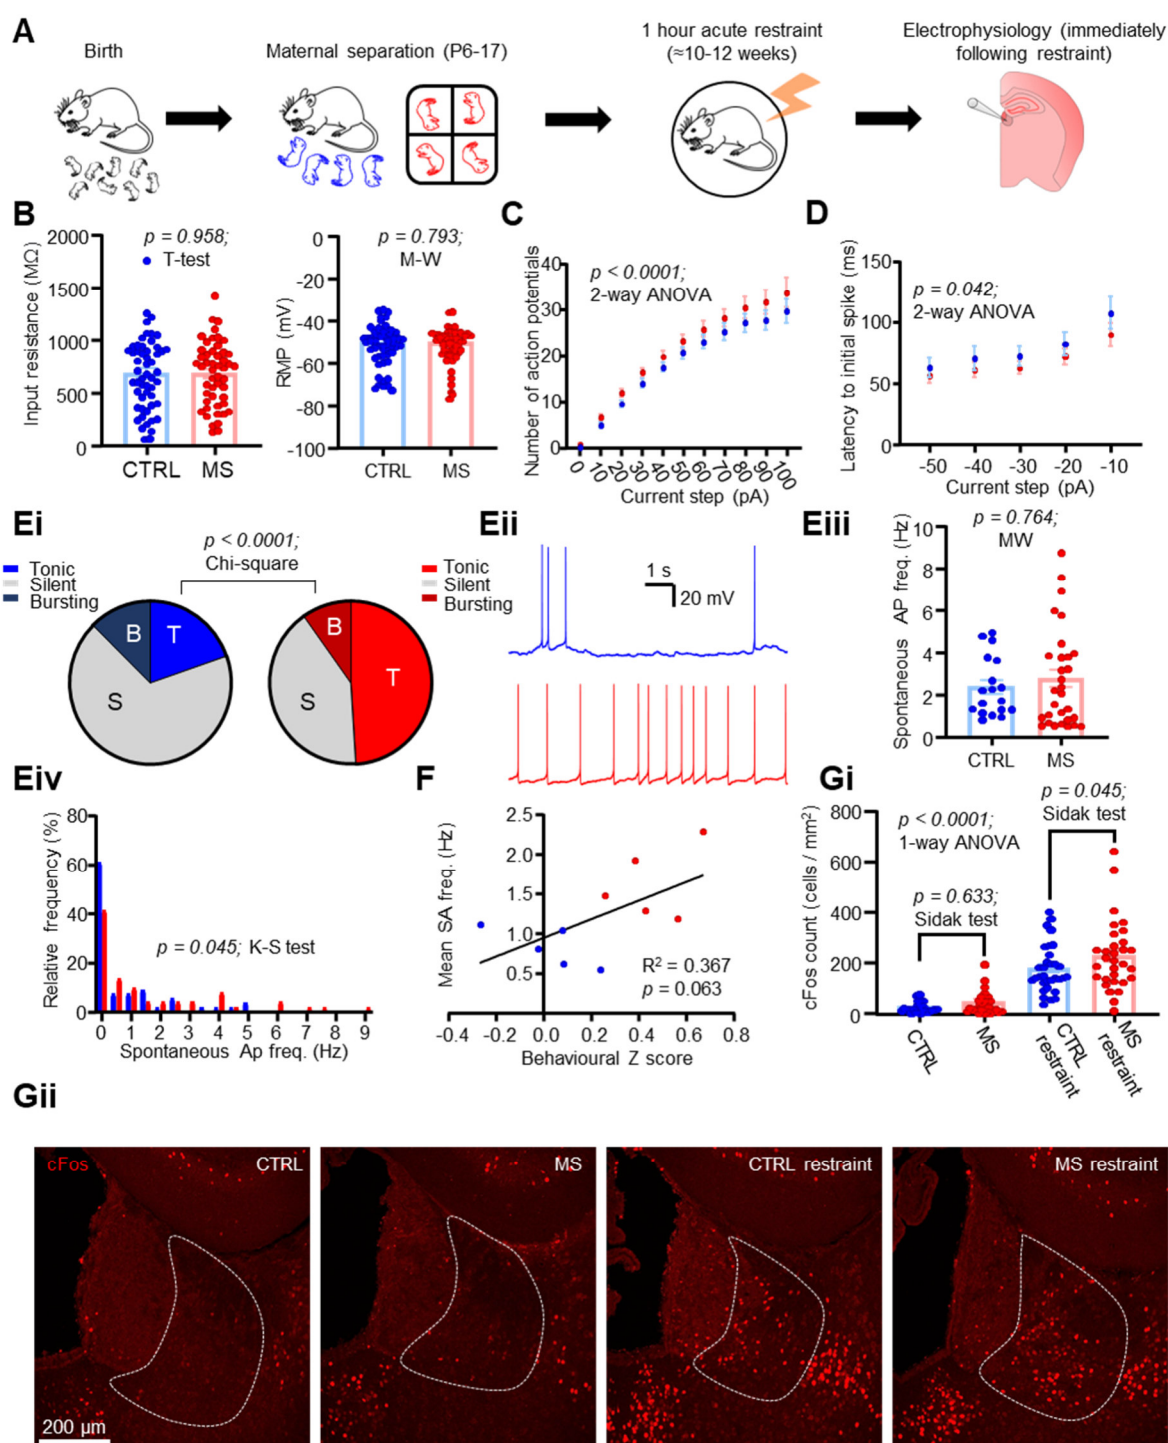

**Figure 5: MS sensitises Lhb neurons to acute restraint stress.**

(A) Schematic illustrating experimental timeline. (B) Comparison plots of passive physiological properties in both conditions. (C) Input-output plot of input current against mean number of induced action potentials. (D) Plot of input current against latency to initial spike of the rebound burst induced upon current step end. (E) Spontaneous activity comparison for both conditions. (Ei) Pie charts depicting fractions of recorded neurons which

498

499

500

501

502

503

504

505

506

507 were classed as spontaneously active ( $> 0.5$  Hz frequency). (Eii) Example  
508 spontaneous activity recordings from both conditions. (Eiii) Comparison plot  
509 of mean spontaneous activity frequency, for neurons which were  
510 spontaneously activity ( $>0.5$  Hz frequency). (Eiv) Probability distribution  
511 histogram comparing mean spontaneous activity distribution for all recorded  
512 neurons between conditions. Data are 0.5 Hz bins. (F) XY plot of  
513 behavioural z score against mean spontaneous activity frequency  
514 calculated for each individual mouse recorded from. Mean spontaneous  
515 activity scores are calculated as the mean spontaneous frequency of all  
516 cells recorded from each mouse. (Gi) cFos cell counts calculated in 4 test  
517 conditions. Data are mean  $\pm$  SEM of cFos counts / area calculated from  
518 individual slices. (Gii) Example confocal images of cFos immunoreactivity  
519 from each of the 4 test conditions.

520

521 Finally, we asked if this increase in activity was synaptically driven. We tested this  
522 by recording sEPSC's in slices from CTRL and MS mice following restraint (n/N = 56/5  
523 CTRL; n/N = 55/5 MS neurons / mice). We observed no difference in sEPSC frequency  
524 (Fig. S4A;  $p = 0.950$ ; Mann-Whitney test) or amplitude (Fig. S4A;  $p = 0.974$ ; Mann-  
525 Whitney test), with no obvious correlation to behavioural phenotype (Fig. S4B;  $p =$   
526  $0.223$ ; simple linear regression). However, we did observe a difference in kinetics, with  
527 many neurons in slices from CTRL mice exhibiting distinctive currents with an  
528 increased rise time (Fig. S4Ci and Cii;  $p = 0.013$ ; Mann-Whitney test) and a strong  
529 trend towards an increased decay (Fig. S4Ci and Ciii;  $p = 0.051$ ; Mann-Whitney test)  
530 which were less prevalent in MS mice. We also observed a clearly different data  
531 distributions for both rise time (Fig. S4Cii;  $p < 0.0001$ ; Kolmogorov-Smirnov test) and  
532 decay (Fig. S4Ciii;  $p < 0.0001$ ; Kolmogorov-Smirnov test). These distinctive currents  
533 appeared to be AMPA-mediated in that they were sensitive to the AMPA antagonist  
534 NBQX (Fig. S4Ci and Fig S5;  $p < 0.0001$ ; Dunn's multiple comparisons test), but not  
535 the NMDA antagonist AP5 (Fig. S5;  $p = 0.324$ ; Dunn's multiple comparisons test). A  
536 possible explanation for this may be differences in AMPA subunit composition  
537 between MS and CTRL mice, which reflects differences in ongoing plasticity (Henley  
538 and Wilkinson, 2016). Interestingly AMPA currents with extended kinetics have  
539 recently been shown to be involved in the induction of synaptic plasticity in  
540 hippocampal principal cells (Pampaloni *et al.*, 2021), and as such we can speculate  
541 that this may be ongoing to a greater extent in CTRL mice, which may be related to  
542 the induction of depressive symptoms following restraint stress (Zheng *et al.*, 2022).  
543 Indeed, it would make sense that these events are less prominent in MS mice, where  
544 it can be assumed that synaptic potentiation has already occurred to a greater extent.  
545 Altogether, these data are indicative of a scenario whereby LHb neurons are more  
546 responsive to stress following MS likely via differences in postsynaptic AMPA receptor  
547 subunit composition.

## 548 Discussion

549 In this work we have implemented the maternal separation model of depression, in  
550 tandem with behavioural assays and *in vitro* electrophysiological recording techniques  
551 to dissect how early life stress influences the behavioural state and the underlying  
552 physiology of the LHb in adult mice. We report that the depressive phenotype is  
553 relatively weak in the adults. We also find that this is accompanied by a decrease in  
554 spontaneous neuronal activity, with a weakening of synaptic input from inhibitory  
555 SOM-positive forebrain neurons. However, rather than being more active at rest, in  
556 our model we find that the LHb neurons have a heightened sensitivity to respond to  
557 the re-exposure of stressful events. This may offer a neurobiological explanation as to  
558 why relapses occur following remission of depressive episodes.

559 Relating to our conclusions, arguably the most important aspect of our work that  
560 must be discussed is the validity of the MS model in successfully inducing depressive  
561 symptoms. It is important to note that historically, works implicating the MS model of  
562 depression have reported very variable results (Tractenberg *et al.*, 2016). Indeed,  
563 while some studies have reported that early life stress can reliably induce depressive  
564 symptoms and drive LHb hyperactivity (Tchenio *et al.*, 2017; Authement *et al.*, 2018;  
565 Simmons *et al.*, 2020; Langlois *et al.*, 2022), others have reported a failure of early life  
566 stress to induce a depressive phenotype (Millstein and Holmes, 2007; Tan *et al.*,  
567 2017), and some evidence has even reported that it can induce resilience in the adult  
568 animals (Shi *et al.*, 2021). This inherent variability in reliability of MS is likely at least  
569 partially explained by inconsistencies in protocols, with longer periods of separation  
570 generally being thought to more reliably induce aberrant phenotypes (Nylander and  
571 Roman, 2013). Another possible explanation is species and strain difference: it is  
572 believed that mice are generally more resistant to the adverse effects of MS than rats  
573 (Own and Patel, 2013; Tractenberg *et al.*, 2016), and C57 mice are thought to be  
574 particularly resilient (Own and Patel, 2013). Hence, we employed the maternal  
575 separation with early weaning variant of the protocol (George *et al.*, 2010), a variant  
576 of the protocol with an extended separation period (6 hours per day) and early weaning  
577 at postnatal day 17 which has previously been shown to induce a phenotype in C57  
578 mice, and even with this optimized protocol we could only observe relatively few  
579 behavioural deficits. Importantly however, of the behavioural deficits we did observe,  
580 these all point in the direction of the MS mice exhibiting a more susceptible phenotype  
581 than the CTRL mice, hence ruling out the possibility that our model has also promoted  
582 resilience (Fig. 1).

583 The next key question that must be addressed is why our model induces a  
584 reduction in spontaneous activity within the LHb. It is now very well accepted that LHb  
585 hyperactivity promotes depressive behaviour (Li *et al.*, 2011; Lecca *et al.*, 2016;  
586 Tchenio *et al.*, 2017; Cui *et al.*, 2018; Yang *et al.*, 2018), and our data does not  
587 superficially support this. Firstly, to address this question, we would point to the fact  
588 that in healthy animals, the LHb is active to serve an important purpose: that is to  
589 encode reward prediction error and prevent reinforcement of behaviours with negative

590 outcomes (Hikosaka, 2010). Therefore, the relationship between LHb activity level and  
591 behavioural phenotype is likely not as simple as heightened activity equalling a more  
592 pronounced depressive phenotype, and reduced activity equalling a less depressed  
593 phenotype. Hence it may be the case that a reduction in LHb activity is also indicative  
594 of an aberrant phenotype. Indeed, a recent hypothesis has proposed that LHb  
595 hypoactivity in childhood may promote attention deficit hyperactivity disorder, which in  
596 turn primes the LHb to be more responsive to stress in adulthood (Lee and Goto,  
597 2021). Experimental evidence has also shown that LHb inactivation induces a reversal  
598 learning deficit (Baker *et al.*, 2015), which may explain why we see a prominent deficit  
599 in sucrose preference when the position of the bottles are switched (Fig. 1B). Thus,  
600 LHb hypoactivity is not likely to promote a healthy phenotype. Secondly, and in line  
601 with our first point, our recordings in CTRL mice (Fig. 2B) largely agree with the  
602 existing literature (Yang *et al.*, 2018; Simmons *et al.*, 2020; Langlois *et al.*, 2022) in  
603 the observed distribution of tonic, bursting and silent neurons, thus supporting the  
604 claim that background LHb activity is important within healthy animals, and also ruling  
605 out the possibility of a recording artefact. Finally, although it is now well accepted that  
606 excitatory synaptic drive is potentiated onto the LHb in depression (Li *et al.*, 2011), it  
607 should also be noted that there is somewhat conflicting evidence in that recent work  
608 has also observed a decrease in postsynaptic LHb AMPA receptor expression  
609 following exposure to stress (Nuno-Perez *et al.*, 2021). Indeed, our data also suggest  
610 that a more depressed phenotype correlates with a reduction in spontaneous  
611 excitatory postsynaptic current frequency (Fig. S2B). Accounting for all of this  
612 evidence we would therefore conclude that in addition to LHb hyperactivity, LHb  
613 hypoactivity may also promote an aberrant phenotype and as such the reduction in  
614 spontaneous activity we observe is not mutually exclusive with the central hypothesis  
615 that LHb hyperactivity drives depression.

616 In terms of inhibitory signalling within the LHb, the literature is relatively consistent  
617 in that this promotes behavioural reinforcement (Faget *et al.*, 2018; Stephenson-Jones  
618 *et al.*, 2020; Lalive *et al.*, 2022), and that inhibition of the LHb has an antidepressant  
619 effect (Winter *et al.*, 2011; Huang *et al.*, 2019). Consistent with this, inhibitory signalling  
620 has been shown to be perturbed in various models of depression (Shabel *et al.*, 2014;  
621 Lecca *et al.*, 2016; Tchenio *et al.*, 2017), and indeed our data lend further support to  
622 this hypothesis. It is interesting to note that the loss of spontaneous inhibitory input we  
623 observed appears to be specific for the medial portion of the LHb (Fig. 3B). Previous  
624 work has identified a population of inhibitory LHb neurons which resides specifically  
625 within the medial LHb (Zhang *et al.*, 2018; Flanigan *et al.*, 2020), and hence one could  
626 speculate that activity of this population may be down-regulated following MS,  
627 therefore resulting in a loss of local inhibition. Additionally, we also report a reduction  
628 in connectivity between inhibitory pallidal neurons and the LHb, which our data also  
629 suggest involves a possible presynaptic reduction in excitability (Fig. 4E-G). While  
630 previous work has characterised inhibitory projections from various pallidal regions to  
631 the LHb relatively extensively (Golden *et al.*, 2016; Faget *et al.*, 2018; Stephenson-  
632 Jones *et al.*, 2020; Pribrag *et al.*, 2021), to our knowledge this is the first time that such

633 a projection has been shown to be implicated in the pathogenesis of a model of  
634 depression.

## 635 **Conclusions**

636 Depression is a complex disease, with hugely variable aetiology (Otte *et al.*, 2016).  
637 Our work further complements the existing literature in that we provide evidence that  
638 LHb hypoactivity can also be associated with a depressive phenotype, and may be  
639 representative of a state where the animal is hypersensitive to stressful events. This  
640 work challenges the classical view that within the LHb, hyperactivity is the sole driver  
641 state of depressive behaviour. Further work into the specific molecular mechanisms  
642 by which these changes occur may shed new light onto the pathogenesis of  
643 depression and may unveil novel molecular targets for future therapies.

644 **Acknowledgement**

645 We are grateful to the BPU staff for expert technical assistance. This work was funded  
646 by an EPSRC Doctoral Prize to JFW, a NARSAD Young Investigator Award to CW  
647 (Grant number 28217, named P&S Fund Investigator) and by the European Union's  
648 Horizon 2020 Research and Innovation Program under Grant Agreement No. ICT-36-  
649 2020-101016787, DEEPER to CW.

650

651 **Author contributions**

652 JFW performed the experiments, SB contributed to experiments, CW and JFW  
653 designed the study, CW supervised the work. JFW wrote manuscript with help of CW.  
654 All authors read and approved the final version of the manuscript.

## 655 **References**

- 656 Authement, M. E., Langlois, L. D., Shepard, R. D., Browne, C. A., Lucki, I., Kassis, H.  
657 and Nugent, F. S. (2018) 'A role for corticotropin-releasing factor signaling in the lateral  
658 habenula and its modulation by early-life stress', *Science Signaling*, 11(520), p.  
659 eaan6480. doi: 10.1126/scisignal.aan6480.
- 660 Baker, P. M. and Mizumori, S. J. Y. (2017) 'Control of behavioral flexibility by the lateral  
661 habenula', *Pharmacology Biochemistry and Behavior*, 162, pp. 62–68. doi:  
662 10.1016/j.pbb.2017.07.012.
- 663 Baker, P. M., Oh, S. E., Kidder, K. S. and Mizumori, S. J. Y. (2015) 'Ongoing behavioral  
664 state information signaled in the lateral habenula guides choice flexibility in freely  
665 moving rats', *Frontiers in Behavioral Neuroscience*, 9(295), pp. 1–22.
- 666 Cerniauskas, I., Winterer, J., Jong, J. W. De, Lukacsovich, D., Yang, H., Khan, F.,  
667 Peck, J. R., Obayashi, S. K., Lilascharoen, V., Lim, B. K., Foldy, C. and Lammel, S.  
668 (2019) 'Chronic Stress Induces Activity, Synaptic, and Transcriptional Remodeling of  
669 the Lateral Habenula Associated with Deficits in Motivated Behaviors', *Neuron*, 104(5),  
670 pp. 899-915.e8. doi: 10.1016/j.neuron.2019.09.005.
- 671 Cui, Y., Yang, Y., Ni, Z., Dong, Y., Cai, G., Foncelle, A., Ma, S., Sang, K., Tang, S.,  
672 Li, Y., Shen, Y., Berry, H., Wu, S. and Hu, H. (2018) 'Astroglial Kir4.1 in the lateral  
673 habenula drives neuronal bursts in depression', *Nature*, 554(7692), pp. 323–327. doi:  
674 10.1038/nature25752.
- 675 Faget, L., Zell, V., Souter, E., McPherson, A., Ressler, R., Gutierrez-reed, N., Yoo, J.  
676 H., Dulcis, D. and Hnasko, T. S. (2018) 'Opponent control of behavioral reinforcement  
677 by inhibitory and excitatory projections from the ventral pallidum', *Nature*  
678 *Communications*, 9(1), pp. 1–14. doi: 10.1038/s41467-018-03125-y.
- 679 Flanigan, M. E. *et al.* (2020) 'Orexin signaling in GABAergic lateral habenula neurons  
680 modulates aggressive behavior in male mice', *Nature Neuroscience*, 23(5), pp. 638–  
681 650. doi: 10.1038/s41593-020-0617-7.
- 682 Friard, O. and Gamba, M. (2016) 'BORIS: a free, versatile open-source event-logging  
683 software for video/audio coding and live observations', *Methods in Ecology and*  
684 *Evolution*, 7(11), pp. 1325–1330. doi: 10.1111/2041-210X.12584.
- 685 Fukumitsu, K., Kaneko, M., Maruyama, T., Yoshihara, C., Huang, A. J., McHugh, T.  
686 J., Itohara, S., Tanaka, M. and Kuroda, K. O. (2022) 'Amylin-Calcitonin receptor  
687 signaling in the medial preoptic area mediates affiliative social behaviors in female  
688 mice', *Nature Communications*. Springer US, 13(709). doi: 10.1038/s41467-022-  
689 28131-z.
- 690 George, E. D., Bordner, K. A., Elwafi, H. M. and Simen, A. A. (2010) 'Maternal  
691 separation with early weaning: A novel mouse model of early life neglect', *BMC*  
692 *Neuroscience*, 11(123). doi: 10.1186/1471-2202-11-123.

- 693 Golden, S. A. *et al.* (2016) 'Basal forebrain projections to the lateral habenula modulate  
694 aggression reward', *Nature*, 534(7609), pp. 688–692. doi: 10.1038/nature18601.
- 695 Guilloux, J. P., Seney, M., Edgar, N. and Sibille, E. (2011) 'Integrated behavioral z-  
696 scoring increases the sensitivity and reliability of behavioral phenotyping in mice:  
697 Relevance to emotionality and sex', *Journal of Neuroscience Methods*, 197(1), pp. 21–  
698 31. doi: 10.1016/j.jneumeth.2011.01.019.
- 699 Henley, J. M. and Wilkinson, K. A. (2016) 'Synaptic AMPA receptor composition in  
700 development, plasticity and disease', *Nature Reviews Neuroscience*, 17, pp. 337–250.  
701 doi: 10.1038/nrn.2016.37.
- 702 Hikosaka, O. (2010) 'The habenula: from stress evasion to value-based decision-  
703 making', *Nat Rev Neuroscience*, 11(7), pp. 503–513. doi: 10.1038/nrn2866.
- 704 Hu, H., Cui, Y. and Yang, Y. (2020) 'Circuits and functions of the lateral habenula in  
705 health and in disease', *Nature Reviews Neuroscience*, pp. 277–295. doi:  
706 10.1038/s41583-020-0292-4.
- 707 Huang, L., Xi, Y., Peng, Y., Yang, Y., Huang, X., Fu, Y., Tao, Q., Xiao, J., Yuan, T.,  
708 An, K., Zhao, H., Pu, M., Xu, F., Xue, T., Luo, M., So, K. and Ren, C. (2019) 'A Visual  
709 Circuit Related to Habenula Underlies the Antidepressive Effects of Light Therapy',  
710 *Neuron*, 102(1), pp. 128-142.e8. doi: 10.1016/j.neuron.2019.01.037.
- 711 Jhou, T. C., Fields, H. L., Baxter, M. G., Saper, C. B. and Holland, P. C. (2009) 'The  
712 Rostromedial Tegmental Nucleus (RMTg), a major GABAergic afferent to midbrain  
713 dopamine neurons, encodes aversive stimuli and inhibits motor responses', *Neuron*,  
714 61(5), pp. 786–800. doi: 10.1016/j.neuron.2009.02.001.
- 715 Ji, H. and Shepard, P. D. (2007) 'Lateral habenula stimulation inhibits rat midbrain  
716 dopamine neurons through a GABA(A) receptor-mediated mechanism.', *The Journal*  
717 *of Neuroscience*, 27(26), pp. 6923–6930. doi: 10.1523/JNEUROSCI.0958-07.2007.
- 718 Knowland, D., Lilascharoen, V., Pham Pacia, C., Shin, S., Hou-Jen Wang, E., Kook  
719 Lim, B. and Knowland, D. (2017) 'Distinct Ventral Pallidal Neural Populations Mediate  
720 Separate Symptoms of Depression', *Cell*, 170(2), pp. 284-297.e18. doi:  
721 10.1016/j.cell.2017.06.015.
- 722 Lalive, A. L., Congiu, M., Lewis, C., Groos, D., Clerke, J. A., Tchenio, A., Ge, Y.,  
723 Helmchen, F. and Mameli, M. (2022) 'Synaptic inhibition in the lateral habenula shapes  
724 reward anticipation', *Current Biology*, 32(8), pp. 1829-1836.E4. doi:  
725 10.1016/j.cub.2022.02.035.
- 726 Langlois, L. D., Berman, R. Y., Shepard, R. D., Simmons, S. C., Tsuda, M. C., Gouty,  
727 S., Choi, K. H. and Nugent, F. S. (2022) 'Potentiation of glutamatergic synaptic  
728 transmission onto lateral habenula neurons following early life stress and intravenous  
729 morphine self-administration in rats', *Addiction Biology*, 27(1), p. e13064. doi:  
730 10.1111/adb.13064.



- 731 Lecca, S., Meye, F. J., Trusel, M., Tchenio, A., Harris, J., Schwarz, M. K., Burdakov,  
732 D., Georges, F. and Mameli, M. (2017) 'Aversive stimuli drive hypothalamus-to-  
733 habenula excitation to promote escape behavior', *eLife*, 6, pp. 1–16. doi:  
734 10.7554/eLife.30697.
- 735 Lecca, S., Pelosi, A., Tchenio, A., Moutkine, I., Lujan, R., Hervé, D. and Mameli, M.  
736 (2016) 'Rescue of GABAB and GIRK function in the lateral habenula by protein  
737 phosphatase 2A inhibition ameliorates depression-like phenotypes in mice.', *Nature*  
738 *medicine*, 22(3), pp. 254–61. doi: 10.1038/nm.4037.
- 739 Lee, Y. A. and Goto, Y. (2021) 'The Habenula in the Link Between ADHD and Mood  
740 Disorder', *Frontiers in Behavioral Neuroscience*, 15, p. 699691. doi:  
741 10.3389/fnbeh.2021.699691.
- 742 Li, B., Piriz, J., Mirrione, M., Chung, C., Proulx, C. D., Schulz, D., Henn, F. and  
743 Malinow, R. (2011) 'Synaptic potentiation onto habenula neurons in the learned  
744 helplessness model of depression.', *Nature*, 470(7335), pp. 535–539. doi:  
745 10.1038/nature09742.
- 746 Libovner, Y., Fariborzi, M., Tabba, D., Ozgur, A., Jafar, T. and Lur, G. (2020)  
747 'Repeated exposure to multiple concurrent stresses induce circuit specific loss of  
748 inputs to the posterior parietal cortex', *Journal of Neuroscience*, 40(9), pp. 1849–1861.  
749 doi: 10.1523/JNEUROSCI.1838-19.2020.
- 750 Matsumoto, M. and Hikosaka, O. (2007) 'Lateral habenula as a source of negative  
751 reward signals in dopamine neurons.', *Nature*, 447(7148), pp. 1111–1115.
- 752 Millstein, R. A. and Holmes, A. (2007) 'Effects of repeated maternal separation on  
753 anxiety- and depression-related phenotypes in different mouse strains', *Neuroscience*  
754 *and Biobehavioral Reviews*, 31(1), pp. 3–17. doi: 10.1016/j.neubiorev.2006.05.003.
- 755 Nuno-Perez, A., Trusel, M., Lalive, A. L., Congiu, M., Gastaldo, D., Tchenio, A., Lecca,  
756 S., Soiza-Reilly, M., Bagni, C. and Mameli, M. (2021) 'Stress undermines reward-  
757 guided cognitive performance through synaptic depression in the lateral habenula',  
758 *Neuron*. Elsevier Inc., 109, pp. 1–10. doi: 10.1016/j.neuron.2021.01.008.
- 759 Nylander, I. and Roman, E. (2013) 'Is the rodent maternal separation model a valid  
760 and effective model for studies on the early-life impact on ethanol consumption?',  
761 *Psychopharmacology*, 229, pp. 555–569. doi: 10.1007/s00213-013-3217-3.
- 762 Otte, C., Gold, S. M., Penninx, B. W., Pariante, C. R., Etkin, A., Fava, M., Mohr, D. C.  
763 and Schatzberg, A. F. (2016) 'Major depressive disorder', *Nature Reviews Disease*  
764 *Primers*, 2(16065).
- 765 Own, L. S. and Patel, P. D. (2013) 'Maternal behavior and offspring resiliency to  
766 maternal separation in c57bl/6 mice', *Hormones and Behavior*, 63(3), pp. 411–7. doi:  
767 10.1016/j.yhbeh.2012.11.010.

- 768 Pampaloni, N. P., Riva, I., Carbone, A. L. and Plested, A. J. R. (2021) 'Slow AMPA  
769 receptors in hippocampal principal cells', *Cell Reports*, 36(5), p. 109496. doi:  
770 10.1016/j.celrep.2021.109496.
- 771 Pribiag, H., Shin, S., Wang, E. H. J., Sun, F., Datta, P., Okamoto, A., Guss, H., Jain,  
772 A., Wang, X. Y., De Freitas, B., Honma, P., Pate, S., Lilascharoen, V., Li, Y. and Lim,  
773 B. K. (2021) 'Ventral pallidum DRD3 potentiates a pallido-habenular circuit driving  
774 accumbal dopamine release and cocaine seeking', *Neuron*, 109(13), pp. 2165-  
775 2182.e10. doi: 10.1016/j.neuron.2021.05.002.
- 776 Rodriguez, A., Zhang, H., Klaminder, J., Brodin, T., Andersson, P. L. and Andersson,  
777 M. (2018) 'ToxTrac: A fast and robust software for tracking organisms', *Methods in  
778 Ecology and Evolution*, 9(3), pp. 460–464. doi: 10.1111/2041-210X.12874.
- 779 Shabel, S. J., Proulx, C. D., Piriz, J. and Manilow, R. (2014) 'Mood regulation.  
780 GABA/glutamate co-release controls habenula output and is modified by  
781 antidepressant treatment.', *Science*, 345(6203), pp. 1494–1498. doi:  
782 10.1126/science.1250469.
- 783 Shi, D.-D., Zhang, Y.-D., Ren, Y.-Y., Peng, S.-Y., Yuan, T.-F. and Wang, Z. (2021)  
784 'Predictable maternal separation confers adult stress resilience via the medial  
785 prefrontal cortex oxytocin signaling pathway in rats', *Molecular Psychiatry*, 26, pp.  
786 7296–7307. doi: 10.1038/s41380-021-01293-w.
- 787 Simmons, S. C., Shepard, R. D., Gouty, S., Langlois, L. D., Flerlage, W. J., Cox, B. M.  
788 and Nugent, F. S. (2020) 'Early life stress dysregulates kappa opioid receptor signaling  
789 within the lateral habenula', *Neurobiology of Stress*. Elsevier Inc., 13, p. 100267. doi:  
790 10.1016/j.ynstr.2020.100267.
- 791 Stephenson-Jones, M., Bravo-Rivera, C., Ahrens, S., Furlan, A., Xiao, X., Fernandes-  
792 Henriques, C. and Li, B. (2020) 'Opposing Contributions of GABAergic and  
793 Glutamatergic Ventral Pallidal Neurons to Motivational Behaviors', *Neuron*, 105(5), pp.  
794 921-933.e5.
- 795 Tan, S., Ho, H. S., Song, A. Y., Low, J. and Je, H. S. (2017) 'Maternal separation does  
796 not produce a significant behavioral change in mice', *Experimental Neurobiology*,  
797 26(6), pp. 390–398. doi: 10.5607/en.2017.26.6.390.
- 798 Taniguchi, H., He, M., Wu, P., Kim, S., Paik, R., Sugino, K., Kvitsani, D., Fu, Y., Lu, J.,  
799 Lin, Y., Miyoshi, G., Shima, Y., Fishell, G., Nelson, S. B. and Huang, Z. J. (2011) 'A  
800 Resource of Cre Driver Lines for Genetic Targeting of GABAergic Neurons in Cerebral  
801 Cortex', *Neuron*, 71(6), pp. 995–1013.
- 802 Tchenio, A., Lecca, S., Valentinova, K. and Mameli, M. (2017) 'Limiting habenular  
803 hyperactivity ameliorates maternal separation-driven depressive-like symptoms',  
804 *Nature Communications*, 8(1), p. 1135. doi: 10.1038/s41467-017-01192-1.
- 805 Tractenberg, S. G., Levandowski, M. L., de Azeredo, L. A., Orso, R., Roithmann, L.  
806 G., Hoffmann, E. S., Brenhouse, H. and Grassi-Oliveira, R. (2016) 'An overview of

- 807 maternal separation effects on behavioural outcomes in mice: Evidence from a four-  
808 stage methodological systematic review', *Neuroscience and Biobehavioral Reviews*,  
809 68, pp. 489–503. doi: 10.1016/j.neubiorev.2016.06.021.
- 810 Wang, R. Y. and Aghajanian, G. K. (1977) 'Physiological evidence for habenula as  
811 major link between forebrain and midbrain raphe', *Science*, 197(4298), pp. 89–91. doi:  
812 10.1126/science.194312.
- 813 Webster, J. F., Vroman, R., Balueva, K., Wulff, P., Sakata, S. and Wozny, C. (2020)  
814 'Disentangling neuronal inhibition and inhibitory pathways in the lateral habenula',  
815 *Scientific Reports*, 10, pp. 1–17. doi: 10.1038/s41598-020-65349-7.
- 816 Winter, C., Vollmayr, B., Djodari-Irani, A., Klein, J. and Sartorius, A. (2011)  
817 'Pharmacological inhibition of the lateral habenula improves depressive-like behavior  
818 in an animal model of treatment resistant depression', *Behav Brain Res*, 216(1), pp.  
819 463–465. doi: 10.1016/j.bbr.2010.07.034.
- 820 Yang, Y., Cui, Y., Sang, K., Dong, Y., Ni, Z., Ma, S. and Hu, H. (2018) 'Ketamine blocks  
821 bursting in the lateral habenula to rapidly relieve depression', *Nature*, 554(7692), pp.  
822 317–322. doi: 10.1038/nature25509.
- 823 Zhang, L., Hernández, V. S., Swinny, J. D., Verma, A. K., Giesecke, T., Emery, A. C.,  
824 Mutig, K., Garcia-Segura, L. M. and Eiden, L. E. (2018) 'A GABAergic cell type in the  
825 lateral habenula links hypothalamic homeostatic and midbrain motivation circuits with  
826 sex steroid signaling', *Translational Psychiatry*, 8(1), p. 50. doi: 10.1038/s41398-018-  
827 0099-5.
- 828 Zheng, Z., Guo, C., Li, M., Yang, L., Liu, P., Zhang, X., Liu, Y., Guo, X., Cao, S., Dong,  
829 Y., Zhang, C., Chen, M., Xu, J., Hu, H. and Cui, Y. (2022) 'Hypothalamus-habenula  
830 potentiation encodes chronic stress experience and drives depression onset', *Neuron*.  
831 Elsevier Inc., pp. 1–16. doi: 10.1016/j.neuron.2022.01.011.

832 **Supplemental information**

833

834 **Effects of early life stress and subsequent re-exposure to stress on**  
835 **neuronal activity in the lateral habenula**

836

837 **Jack F. Webster<sup>1</sup>, Sanne Beerens<sup>1</sup> & Christian Wozny<sup>1,2</sup>**

838

839 1 Strathclyde Institute for Pharmacy and Biomedical Sciences, University of  
840 Strathclyde, Glasgow, G4 0RE, United Kingdom

841 2 MSH Medical School Hamburg, Medical University, Institute for Molecular Medicine,  
842 20457 Hamburg, Germany

843

844 For correspondence: [christian.wozny@medicalschooll-hamburg.de](mailto:christian.wozny@medicalschooll-hamburg.de)

845

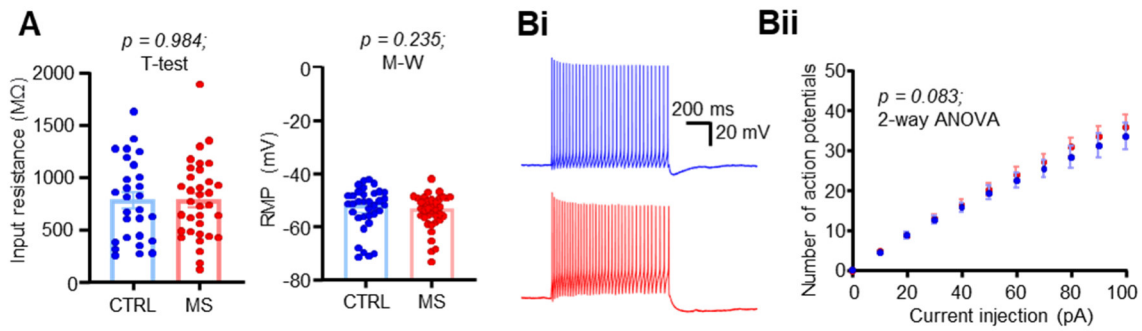

846

847

848

849

### Supplementary Figure 1: Effects of MS on passive physiological properties and intrinsic excitability.

850

851

852

853

854

(A) Comparison plots of passive physiological properties between conditions. (Bi) Example sEPSC recordings in both conditions. (Bii) Example traces of action potential discharge in response to a 100 pA current step in both conditions. (Bii) Input-output plot of input current against mean number of induced action potentials.

855

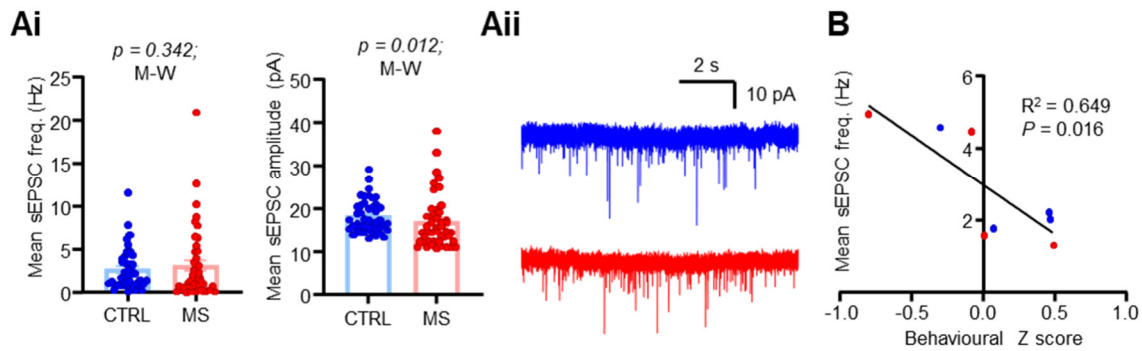

856

857

858

859

### Supplementary figure 2: Effects of MS on spontaneous excitatory input to the LHb.

860

861

862

863

864

(Ai) Comparison plots of sEPSC frequency and amplitude between conditions. (Aii) Example sEPSC recordings in both conditions. (B) XY plot of behavioural z score against mean sEPSC frequency calculated for each individual mouse recorded from. Mean sEPSC scores are calculated as the mean sEPSC frequency of all cells recorded from each mouse.

865

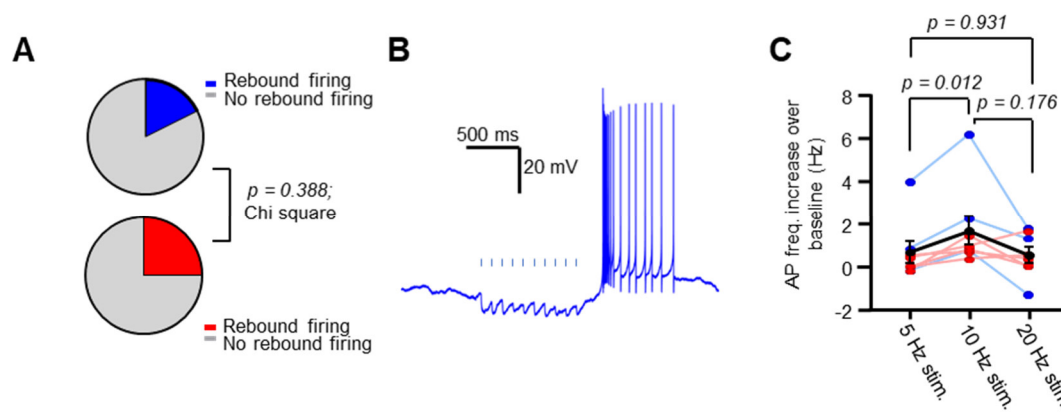

866

867

868 **Supplementary figure 3. Optogenetic stimulation of inhibitory**  
869 **forebrain terminals can drive rebound firing within the LHb.**

870 (A) Fractions of neurons which exhibited rebound firing following  
871 optogenetic stimulation in both conditions. (B) Example trace from a neuron  
872 recorded in a CTRL mouse. (C) Comparison of rebound firing between  
873 stimulation frequencies as an increase over baseline spontaneous firing.  
874 Note here that as no difference was observed between CTRL and MS mice,  
875 these are displayed on the same plot.  $p$  values here are from Tukey's  
876 multiple comparisons test.

877

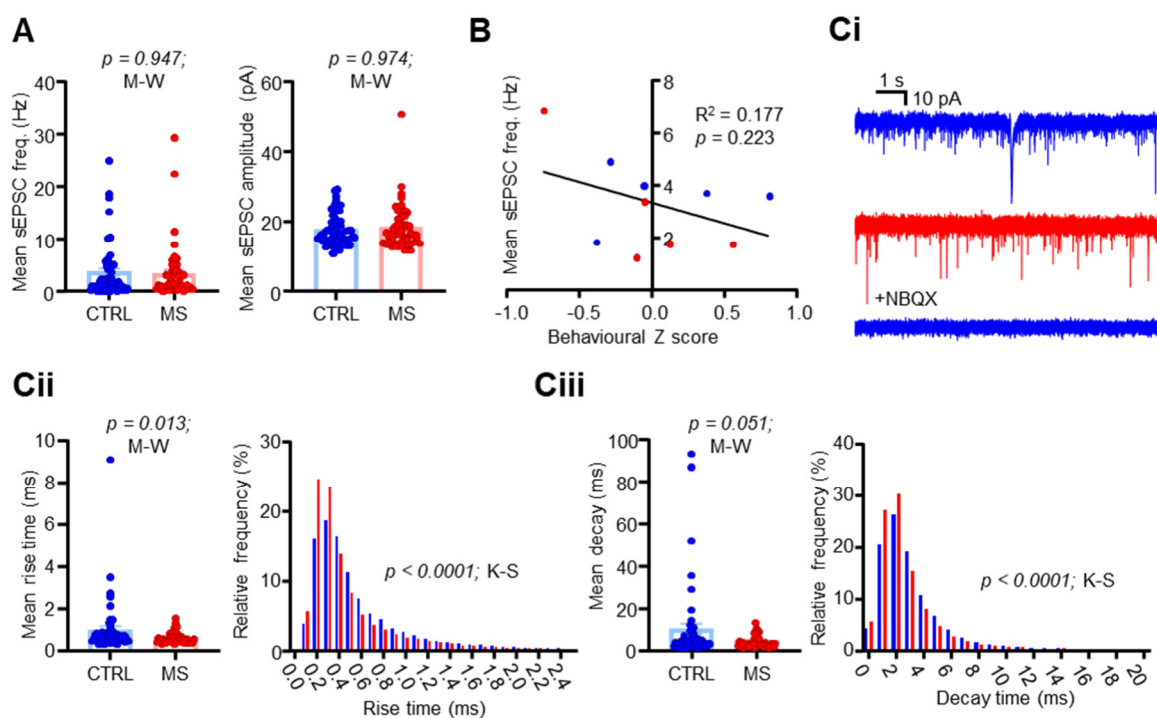

878

879

880 **Supplementary figure 4: MS alters AMPA receptor signalling in**  
 881 **response to acute stress within the LHb.**

882 (A) Comparison plots of sEPSC frequency and amplitude between  
 883 conditions. (B) XY plot of behavioural z score against mean sEPSC  
 884 frequency calculated for each individual mouse recorded from. Mean  
 885 sEPSC scores are calculated as the mean sEPSC frequency of all cells  
 886 recorded from each mouse. (Ci) Example sEPSc recordings from neurons  
 887 from CTRL (top) and MS (mid) mice, and from a CTRL mouse in the  
 888 presence of 10  $\mu$ M NBQX (bottom). (Cii) Left: comparison plots of sEPSC  
 889 rise time between conditions. Probability distribution histogram comparing  
 890 mean rise time distribution for all recorded neurons between conditions.  
 891 Data are 0.1 ms bins. (Ciii) As for Cii, with decay time. For probability  
 892 distribution histogram, data are 1 ms bins.



893

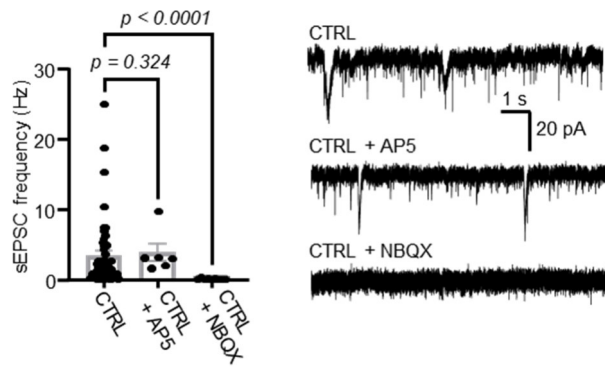

894

895

896

897

**Supplementary figure 5. Spontaneous excitatory currents within the LHb are AMPA-mediated.**

898

899

900

901

Left: comparison plot of sEPSC frequencies recorded in cells without AMPA or NMDA antagonization, with 50  $\mu$ M AP5 and with 10  $\mu$ M NBQX. Right: example recordings from three different neurons from the same animal for each of the conditions shown in the plot on the left.

902
